# Supplementary material for: MultNAT HIV-1 Viral Load Assay: a simple, rapid and sensitive cross-primer amplification assay for detecting the HIV-1 virus in the field
Source: PeerJ. 2025 Aug 28;13:e19753. doi: 10.7717/peerj.19753 (PMC12399072; doi:10.7717/peerj.19753)
Supplement: Supplemental Information 1 [file peerj-13-19753-s001.xlsx]

## Sheet: Sheet1
Sample Number	Concentration of DAAN Assay test	Concentration of MultNAT Assay test
20230727HIV035	167.647	255.669
20230613HIV005	62.9412	30.8289
20230718HIV028	206.471	324.804
20230711HIV040	318.824	466.787
20230713HIV015	277.059	667.727
20230810HIV026	95.2941	74.3622
20230620HIV019	548.235	817.596
20230706HIV007	65.8824	82.9459
20230810HIV007	202.353	90.7768
20230718HIV020	85.2941	97.7107
20230808HIV067	62.9412	101.444
20230718HIV023	58.8235	112.847
20230718HIV042	60	112.847
20230713HIV017	240	119.452
20230613HIV026	151.765	127.327
20230613HIV015	70	130.061
20230615HIV023	115.882	135.699
20230622HIV006	90	136.945
20230711HIV049	298.235	157.343
20230620HIV040	98.8235	166.431
20230810HIV012	64.7059	168.348
20230620HIV028	92.3529	199.581
20230725HIV053	165.294	219.822
20230627HIV008	81.7647	220.799
20230801HIV033	140	223.13
20230711HIV016	63.5294	126.152
20230711HIV028	265.294	234.115
20230627HIV037	193.529	244.474
20230622HIV001	58.8235	161.857
20230725HIV025	436.471	281.148
20230725HIV019	244.706	306.186
20230713HIV024	68.8235	108.255
20230713HIV022	80.5882	108.255
20230627HIV038	118.824	311.769
20230725HIV073	198.824	315.221
20230725HIV036	287.059	323.62
20230718HIV036	351.765	355.712
20230803HIV021	267.647	422.204
20230627HIV010	947.059	427.082
20230801HIV003	1241.18	439.306
20230815HIV002	123.529	473.949
20230620HIV039	337.059	475.598
20230711HIV036	82.3529	125.937
20230815HIV023	177.647	538.022
20230810HIV014	172.353	540.25
20230808HIV025	512.941	577.54
20230613HIV035	234.706	581.296
20230808HIV033	377.059	617.75
20230615HIV022	360.588	650.769
20230808HIV006	162.941	711.706
20230720HIV011	207.059	713.875
20230713HIV009	465.294	875.064
20230718HIV008	177.059	880.802
20230627HIV021	431.765	914.262
20230620HIV024	579.412	126.888
20230627HIV029	201.765	139.702
20230613HIV046	1641.18	1412.01
20230718HIV044	331.765	141.397
20230620HIV012	1064.71	1476.58
20230620HIV002	163.529	169.831
20230711HIV053	280.588	175.295
20230613HIV055	5488.24	1914.99
20230622HIV003	239.412	193.706
20230727HIV032	6588.24	2039.34
20230620HIV054	6235.29	2171.48
20230711HIV039	2700	2185
20230711HIV041	6941.18	2325.94
20230808HIV031	3694.12	2424.38
20230704HIV007	805.882	1475.5
20230808HIV022	1400	2590.54
20230613HIV047	2864.71	2601.69
20230615HIV012	1829.41	2683.62
20230627HIV014	3111.76	2751.38
20230808HIV055	623.529	288.985
20230613HIV057	664.706	292.629
20230627HIV034	12764.7	33163.3
20230613HIV021	458.824	362.734
20230815HIV003	7764.71	3804.69
20230808HIV070	1464.71	3987.25
20230801HIV034	6941.18	4057.95
20230803HIV011	18176.5	4699.3
20230613HIV062	25352.9	48509.6
20230627HIV036	30882.4	49084.1
20230713HIV018	2400	5667.61
20230727HIV005	1229.41	5701.48
20230815HIV015	11000	5764.25
20230620HIV061	4482.35	6155.35
20230727HIV044	17882.4	6574.12
20230801HIV001	16235.3	66581.3
20230711HIV033	15647.1	7842.77
20230718HIV025	3458.82	7981.62
20230803HIV009	21235.3	9210.73
20230627HIV044	6411.76	9232.32
20230815HIV007	7058.82	9808.66
20230613HIV027	10117.6	10011.2
20230720HIV015	3576.47	10069.1
20230727HIV037	15235.3	10069.1
20230627HIV025	14705.9	10553.9
20230613HIV056	14588.2	10914.1
20230711HIV015	56000	11492.1
20230711HIV029	2217.65	12881.2
20230620HIV010	12352.9	12881.2
20230720HIV022	71176.5	13252.4
20230627HIV033	2058.82	13924.2
20230803HIV005	9705.88	17430.3
20230803HIV033	26588.2	17926.6
20230620HIV023	47235.3	17955.6
20230718HIV003	7823.53	20176
20230627HIV011	25000	20768.4
20230622HIV012	37470.6	20768.4
20230808HIV052	15058.8	21852.4
20230613HIV063	11941.2	22037.6
20230725HIV011	65294.1	22395.6
20230613HIV024	14882.4	22651.6
20230615HIV010	41941.2	23154.3
20230615HIV001	71764.7	23797.3
20230803HIV014	43529.4	24150.3
20230810HIV019	45764.7	24324
20230801HIV002	78823.5	25394.6
20230801HIV006	5600	2731.38
20230706HIV020	32764.7	29576.2
20230801HIV052	27647.1	31715
20230706HIV018	90588.2	32582.9
20230803HIV028	34470.6	34445.3
20230801HIV026	42117.6	34460.2
20230718HIV017	7588.24	34743.3
20230613HIV013	19529.4	36840.2
20230711HIV026	14470.6	37233.9
20230620HIV035	36941.2	42330.2
20230711HIV020	19764.7	43401.1
20230725HIV022	61764.7	47575
20230711HIV032	8588.24	4769.36
20230613HIV051	161176	47943.3
20230725HIV012	35705.9	47946.9
20230711HIV003	52529.4	51035.6
20230627HIV015	49294.1	57225.3
20230706HIV013	81764.7	58081.3
20230711HIV006	55117.6	59901.5
20230718HIV005	46764.7	67037.3
20230615HIV028	242941	67037.3
20230613HIV054	174118	67379.6
20230815HIV021	117647	69887.1
20230720HIV017	67647.1	70177
20230706HIV010	210000	71979.6
20230815HIV008	18176.5	74652
20230620HIV064	54705.9	76352
20230801HIV020	110588	76573.2
20230718HIV041	153529	78039.4
20230808HIV034	15117.6	81775.5
20230801HIV046	84117.6	83717.2
20230727HIV051	196471	88017.2
20230803HIV016	309412	91834.3
20230620HIV022	34470.6	96736.9
20230620HIV008	132353	102142
20230711HIV027	41823.5	103154
20230620HIV051	38176.5	104875
20230704HIV010	115294	111590
20230613HIV053	349412	123523
20230725HIV013	62941.2	129755
20230725HIV087	109412	156280
20230718HIV001	277647	178657
20230808HIV013	100588	228109
20230613HIV041	112353	228665
20230720HIV001	56529.4	252928
20230620HIV050	207647	280451
20230801HIV018	168235	294735
20230725HIV014	162353	300015
20230801HIV030	103529	313659
20230713HIV016	440000	319816
20230815HIV013	409412	345780
20230718HIV019	729412	345780
20230801HIV017	794118	699842
20230613HIV048	377059	817267
20230725HIV023	735294	1.19595e+06
20230725HIV086	935294	1.64249e+06
20230718HIV024	455294	2.38665e+06
20230725HIV029	1.14706e+06	2.40353e+06
20230620HIV062	929412	2.86682e+06
20230718HIV016	1.10588e+07	3.37152e+07
20230808HIV062	1.37647e+06	4.89905e+06
20230725HIV047	1.04118e+07	1.3811e+07
20230711HIV038	4.12941e+07	3.52754e+07
